# Supplementary material
Source: HighWire-hosted journal article supplement (https://bmjopen.bmj.com/content/7/8/e016169)
Supplement: inline-supplementary-material-2 [file inline-supplementary-material-2.pdf]

**Supplementary Table** Cause-specific hazard ratios and subdistribution hazard ratios of the **Revasc** versus **Med** difference for matched subgroups

| Normal MPS (N=52) |      |      |      |       |      |      |      | Fixed defects (N=30) |      |      |      |       |      |      |      |
|-------------------|------|------|------|-------|------|------|------|----------------------|------|------|------|-------|------|------|------|
| ACD               |      |      |      | CD/MI |      |      |      | ACD                  |      |      |      | CD/MI |      |      |      |
| CSHR              | p    | SDHR | p    | CSHR  | p    | SDHR | p    | CSHR                 | p    | SDHR | p    | CSHR  | p    | SDHR | p    |
| 7.97              | 0.05 | 7.97 | 0.06 | 4.12  | 0.08 | 4.11 | 0.07 | 1.00                 | 1.00 | 1.41 | 0.55 | 0.70  | 0.67 | 0.92 | 0.92 |
