# Supplementary material
Source: HighWire-hosted journal article supplement (https://bmjopen.bmj.com/content/7/8/e016169)

**Supplementary Figure** Cumulative incidence functions in matched groups. Blue line: **Revasc**, red line: **Med**

a) Patients with normal MPS (N=52)

b) Patients with fixed perfusion defects (N=30)

a)

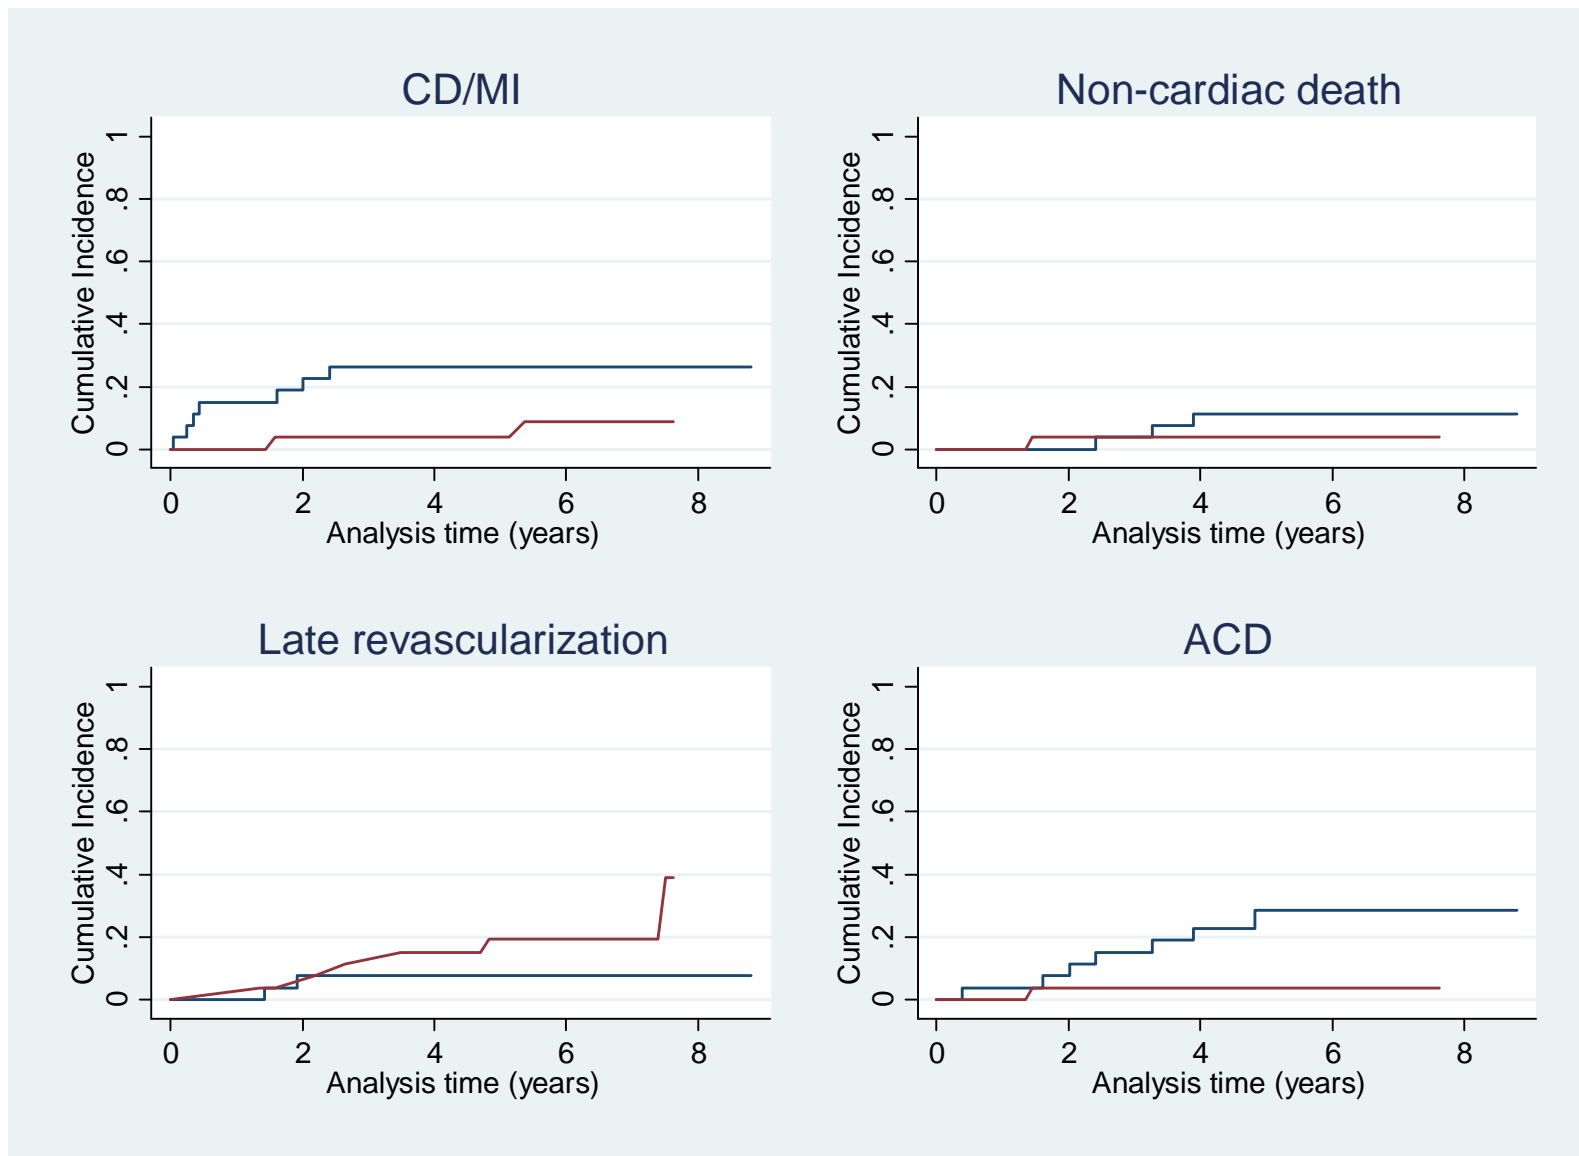

b)

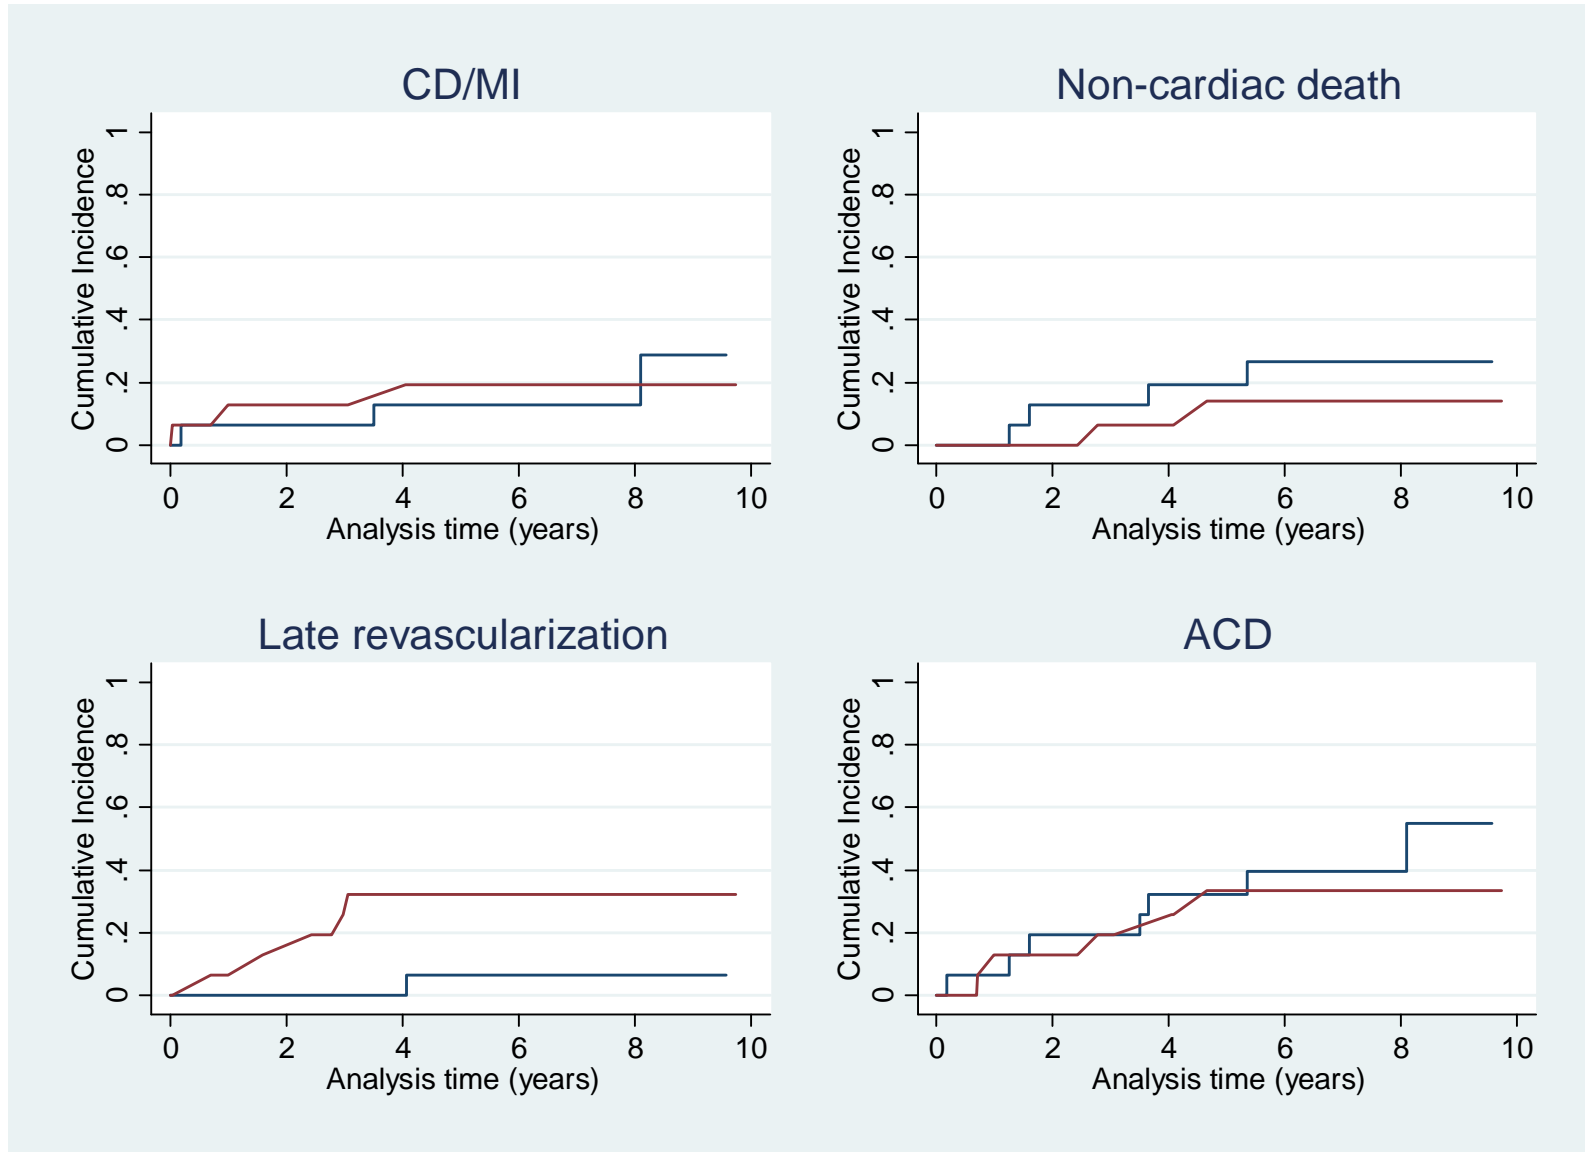

Supplement: inline-supplementary-material-3 [file inline-supplementary-material-3.pdf]
